# Supplementary material for: Hyperglycemia Induces Inflammatory Response of Human Macrophages to CD163-Mediated Scavenging of Hemoglobin-Haptoglobin Complexes
Source: MDPI journal article supplement (doi:10.3390/ijms23031385), 2022-01-26
Supplement: s1 [file s1]

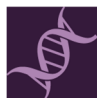

## Supplementary Materials

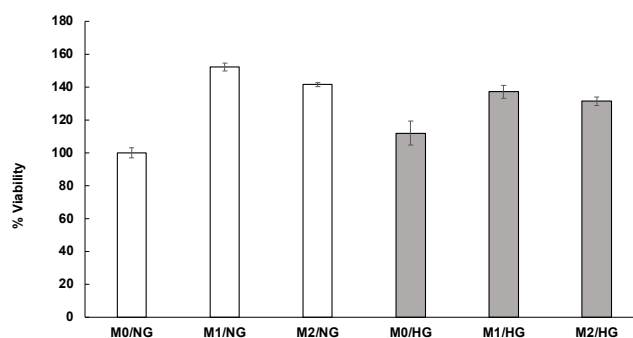

**Figure S1.** Cell viability assessment of non-stimulated (M0), IFN $\gamma$ -stimulated (M1) and IL-4-stimulated (M2) macrophages using alamarBlue™. Human monocyte-derived macrophages were stimulated with IFN $\gamma$  or IL-4 or left without cytokine stimulation and cultured for 6 days in normal (5 mM, NG) and high (25 mM, HG) glucose conditions. On day 6, fluorescence intensity was measured after 3 h of incubation with alamarBlue™. Each bar represents the mean percentage of viability of 4 donors with SEM; all bars were normalized to M0/NS. For statistical analysis, a paired t test was performed.

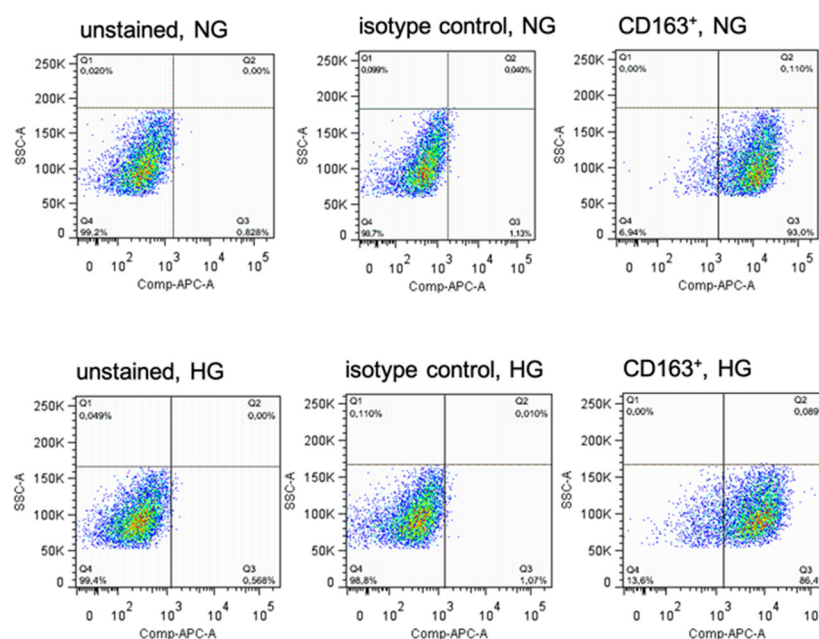

**Figure S2.** Gating process for CD163<sup>+</sup> M(IFN $\gamma$ ). Exemplary depiction of gating process for CD163<sup>+</sup> IFN $\gamma$ -stimulated monocyte-derived macrophages after being cultured for 6 days in normal glucose (5 mM, NG) and high glucose (25 mM, HG) conditions. Graphs depict individual forward-sideward scatter profiles for one donor.

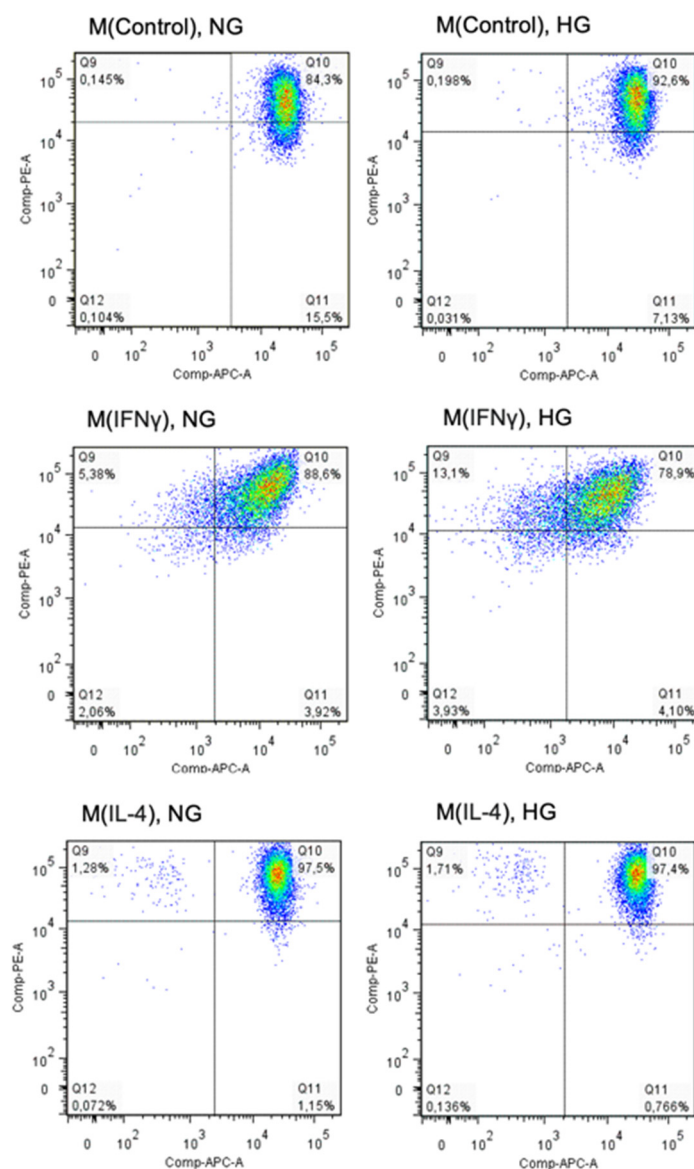

**Figure S3.** Flow cytometry analysis of CD163<sup>+</sup>HLA-DR<sup>+</sup> monocyte-derived macrophages. Exemplary flow cytometry analysis of CD163<sup>+</sup>HLA-DR<sup>+</sup> monocyte-derived macrophages. Monocyte-derived macrophages were cultured for 6 days in normal glucose (5 mM, NG) and high glucose (25 mM, HG) conditions and stimulated with either IFN $\gamma$  or IL-4 or without further cytokines (M(Control)). Graphs depict individual forward-sideward scatter profiles for one donor. To determine CD163 surface expression, an APC-conjugated mouse IgG1 $\kappa$  anti-human CD163 antibody was used (x-axis), to depict HLA-DR surface expression, a PE-conjugated mouse IgG2a $\kappa$  anti-human HLA-DR antibody was used (y-axis).

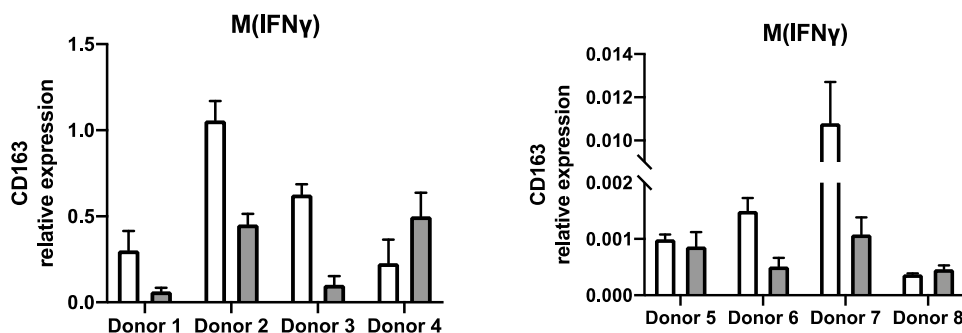

**Figure S4.** RT-PCR analysis of CD163 gene expression in IFN $\gamma$ -stimulated macrophages in Individual donor. RT-PCR analysis of CD163 gene expression in IFN $\gamma$ -stimulated macrophages. Human monocyte-derived macrophages were cultured for 6 days in normal glucose (5 mM, NG, white bars) and high glucose (25 mM, HG, grey bars) conditions. Graphs depict individual values of 8 donors (mean  $\pm$  SD; each condition was measured three times for every donor).

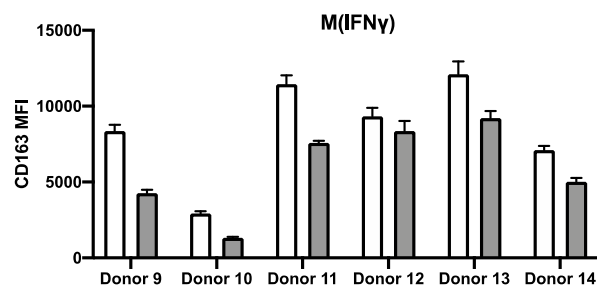

**Figure S5.** Flow cytometry analysis of CD163 surface expression in IFN $\gamma$ -stimulated macrophages in individual donors. Flow cytometry analysis of CD163 surface expression in IFN $\gamma$ -stimulated macrophages. Monocyte-derived macrophages were cultured for 6 days in normal glucose (5 mM, NG, white bars) and high glucose (25 mM, HG, grey bars) conditions. Graph depicts individual values of 6 donors. The values are displayed each as the average of the measurement of three replicates  $\pm$  SD.
